# Supplementary material for: Testis-expressed protein 33 is not essential for spermiogenesis and fertility in mice
Source: PubMed Central journal article supplement — Mol Med Rep. 2021 Mar 3;23(5):317. doi: 10.3892/mmr.2021.11956 (PMC7974414; doi:10.3892/mmr.2021.11956), 2021-03-03

Figure S1. Validation of anti-TEX33 antibody effectiveness and specificity. (A) ELISA assay showing the titers of the anti-TEX33 antibody at dilutions up to 1:1,000,000. (B) Western blot analysis conducted using *Tex33*<sup>+/+</sup>, *Tex33*<sup>+/-</sup> and *Tex33*<sup>-/-</sup> mice revealed that TEX33 protein was absent from the testes of *Tex33*<sup>-/-</sup> mice. (C) Immunofluorescence analysis showed that TEX33 protein was localized to not only the spermatids and sperm within the seminiferous tubules of *Tex33*<sup>+/+</sup> mice, but also (D) the manchette, (E) acrosome and (F) flagellum at high magnification. A450, absorbance at 450 nm; 1-5, the number of the individual rabbit; TEX33, testis-expressed protein 33; +/+, *Tex33*<sup>+/+</sup> (wild-type) mice; +/-, *Tex33*<sup>+/-</sup> (heterozygous) mice; -/-, *Tex33*<sup>-/-</sup> (homozygote) mice; DAPI, 4',6-diamidino-2-phenylindole; A, acrosome (indicated by arrowheads); M, manchette (indicated by arrowheads)..

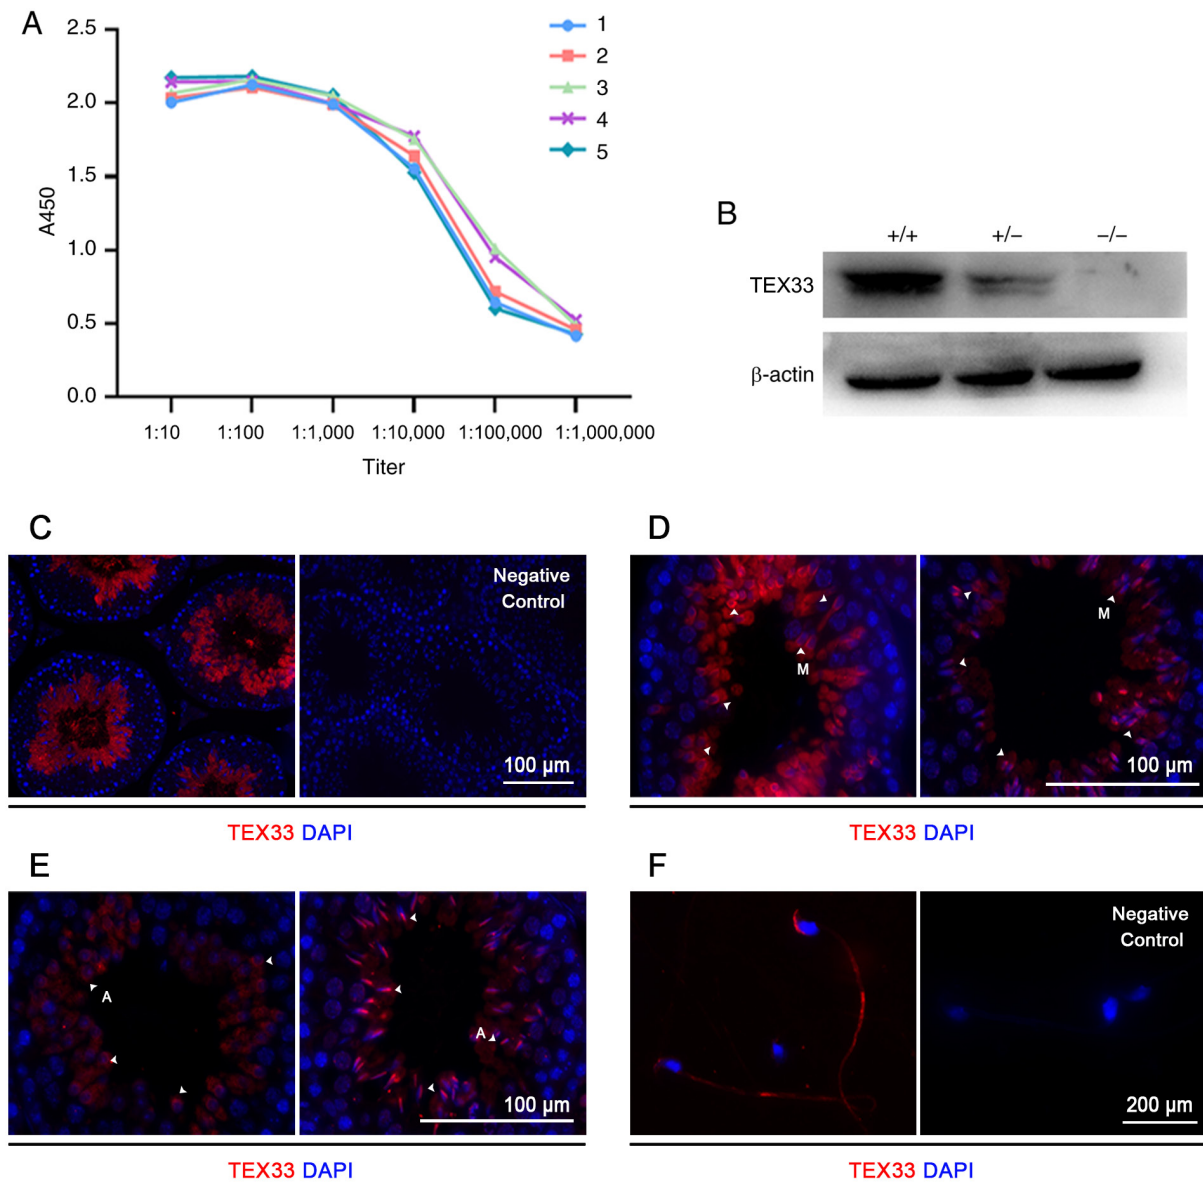

Supplement: Supplementary_Data.pdf [file Supplementary_Data.pdf]
